# Supplementary material for: Comparison of Transcriptome Profiles of the Fungus Botrytis cinerea and Insect Pest Bradysia odoriphaga in Response to Benzothiazole
Source: Front Microbiol. 2020 Jun 12;11:1043. doi: 10.3389/fmicb.2020.01043 (PMC7325989; doi:10.3389/fmicb.2020.01043)
Supplement: TABLE S2 — Summary of RNA-seq reads mapped to the Botrytis cinerea B05.10 genome. [file Table_2.XLSX]

## Sheet: Sheet1
Table S2. Summary of RNA-seq reads mapped to the Botrytis cinerea B05.10 genome
Sample	Repeat	Total Reads	Raw Data Size (bp)	Raw Reads Number	Clean Data Size (bp)	Clean Reads Number	Total Mapped Reads (%)	Unique Match (%)	Number of expressed genes
CON-12 h	1	23674300	1189089150	23781783	1184476300	23689526	89.21	82.39	12961
	2	23694100	1189079600	23781592	1182957250	23659145	88.61	81.92	13126
	3	23700034	1189075750	23781515	1182948600	23658972	89.16	82.27	13098
BT-12 h	1	23689526	1189077300	23781546	1183715000	23674300	88.42	81.56	13088
	2	23659145	1189075550	23781511	1184705000	23694100	88.76	82.16	13129
	3	23658972	1189075250	23781505	1185001700	23700034	89.72	82.85	13135
CON-24 h	1	23681348	1188242000	23764840	1183962650	23679253	89.66	82.7	12841
	2	23364601	1189079400	23781588	1184497050	23689941	89.82	82.97	12765
	3	23402250	1189084700	23781694	1183732300	23674646	88.97	82.08	12972
BT-24 h	1	23679253	1189083550	23781671	1184067400	23681348	87.7	80.82	12951
	2	23689941	1181067450	23621349	1168230050	23364601	87.73	80.89	12840
	3	23674646	1183200700	23664014	1170112500	23402250	87.8	80.98	12996
CON-48 h	1	23408681	1183030200	23660604	1170720450	23414409	88.7	81.92	12898
	2	23426526	1183734700	23674694	1171119400	23422388	88.48	81.69	12969
	3	23422804	1182735250	23654705	1169487200	23389744	87.26	80.25	13259
BT-48 h	1	23414409	1183123650	23662473	1170434050	23408681	87.2	80.42	12933
	2	23422388	1183841200	23676824	1171326300	23426526	86.28	79.12	13045
	3	23389744	1183320600	23666412	1171140200	23422804	86.22	79.42	13080
